# Supplementary material for: Enculturating Coastal Environments in the Middle Mesolithic (8300–6300 cal BCE) – Site Variability, Human–Environment Relations, and Mobility Patterns in Northern Vestfold, SE-Norway
Source: publisher site journal article supplement (doi:10.1515/opar-2022-0251), 2022-01-01
Supplement: Supplementary file 1 [file Appendix_4_Bone_identified_species.xlsx]

## Sheet: Ark1
Site	Id, national database Askeladden	Context	Layer	weigth (g)	NISP	Species, burnt bone	Type	Observation
Adal 1	229871	fireplace 11521	-	0.2	2	Mammalia
Løvås 1	40831	possible sunken floor 10693	4	0.2	11	Mammalia
Løvås 1	40831	possible sunken floor 10693	4	0.7	8	Mammalia
Løvås 1	40831	possible sunken floor 10693	3	0.3	1	Mammalia		worked fragment
Løvås 1	40831	possible sunken floor 10693	3	0.9	7	Mammalia
Løvås 1	40831	fireplace 24057	2	0.2	2	Mammalia		C14-date to Pre-roman Age
Løvås 1	40831	site layer	3	0.3	1	Mammalia	ossa longum, diaphys
Løvås 2	40831	site layer	1	0.2	1	Mammalia
Løvås 2	40831	site layer	1	0.2	1	Mammalia
Løvås 2	40831	site layer	2	0.4	1	Mammalia
Løvås 2	40831	site layer	1	0.3	1	Mammalia
Løvås 2	40831	site layer	2	0.9	1	Mammalia
Løvås 2	40831	site layer	1	0.4	1	Mammalia
Løvås 2	40831	site layer	1	0.2	1	Mammalia		cut marks
Løvås 2	40831	site layer	2	0.4	1	Mammalia
Løvås 2	40831	site layer	1	0.2	1	Mammalia
Løvås 2	40831	site layer	1	1	2	Mammalia
Løvås 2	40831	site layer	2	0.5	1	Mammalia
Løvås 2	40831	site layer	1	0.9	3	Mammalia
Løvås 2	40831	site layer	1	0.1	2	Mammalia
Løvås 2	40831	site layer	2	0.4	1	Mammalia
Løvås 2	40831	site layer	2	2	1	Mammalia
Løvås 2	40831	site layer	1	0.4	1	Rangifer taranus	metacarpale II/V, distal	C14-date to Middle Mesolithic
Løvås 3	40831	possible sunken floor 27142	2	0.1	2	Mammalia
Løvås 3	40831	possible sunken floor 27142	2	0.1	1	Mammalia
Løvås 3	40831	possible sunken floor 27142	2	0.1	1	Mammalia
Løvås 3	40831	possible sunken floor 27142	1	0.1	3	Mammalia
Løvås 3	40831	possible sunken floor 27142	2	0.2	1	Mammalia
Løvås 3	40831	possible sunken floor 27142	1	0.1	1	Mammalia
Løvås 3	40831	possible sunken floor 27142	2	0.4	6	Mammalia
Løvås 3	40831	possible sunken floor 27142	2	0.4	4	Mammalia
Løvås 3	40831	possible sunken floor 27142	2	0.6	7	Mammalia
Løvås 3	40831	possible sunken floor 27142	1	2.6	15	Mammalia
Løvås 3	40831	possible sunken floor 27142	1	0.3	1	Phocidae	costae, corpus, juvenil
Løvås 3	40831	possible sunken floor 27142	1	0.9	2	Mammalia		two refitted fragments of worked bone, elongated artefact, possible shaft of largr fish hook or point
Sum				17.2	96
